# Supplementary material
Source: PubMed Central journal article supplement (PMC4976004)
Supplement: NIHMS796928-supplement-1.pdf [file NIHMS796928-supplement-1.pdf]

Figure S1

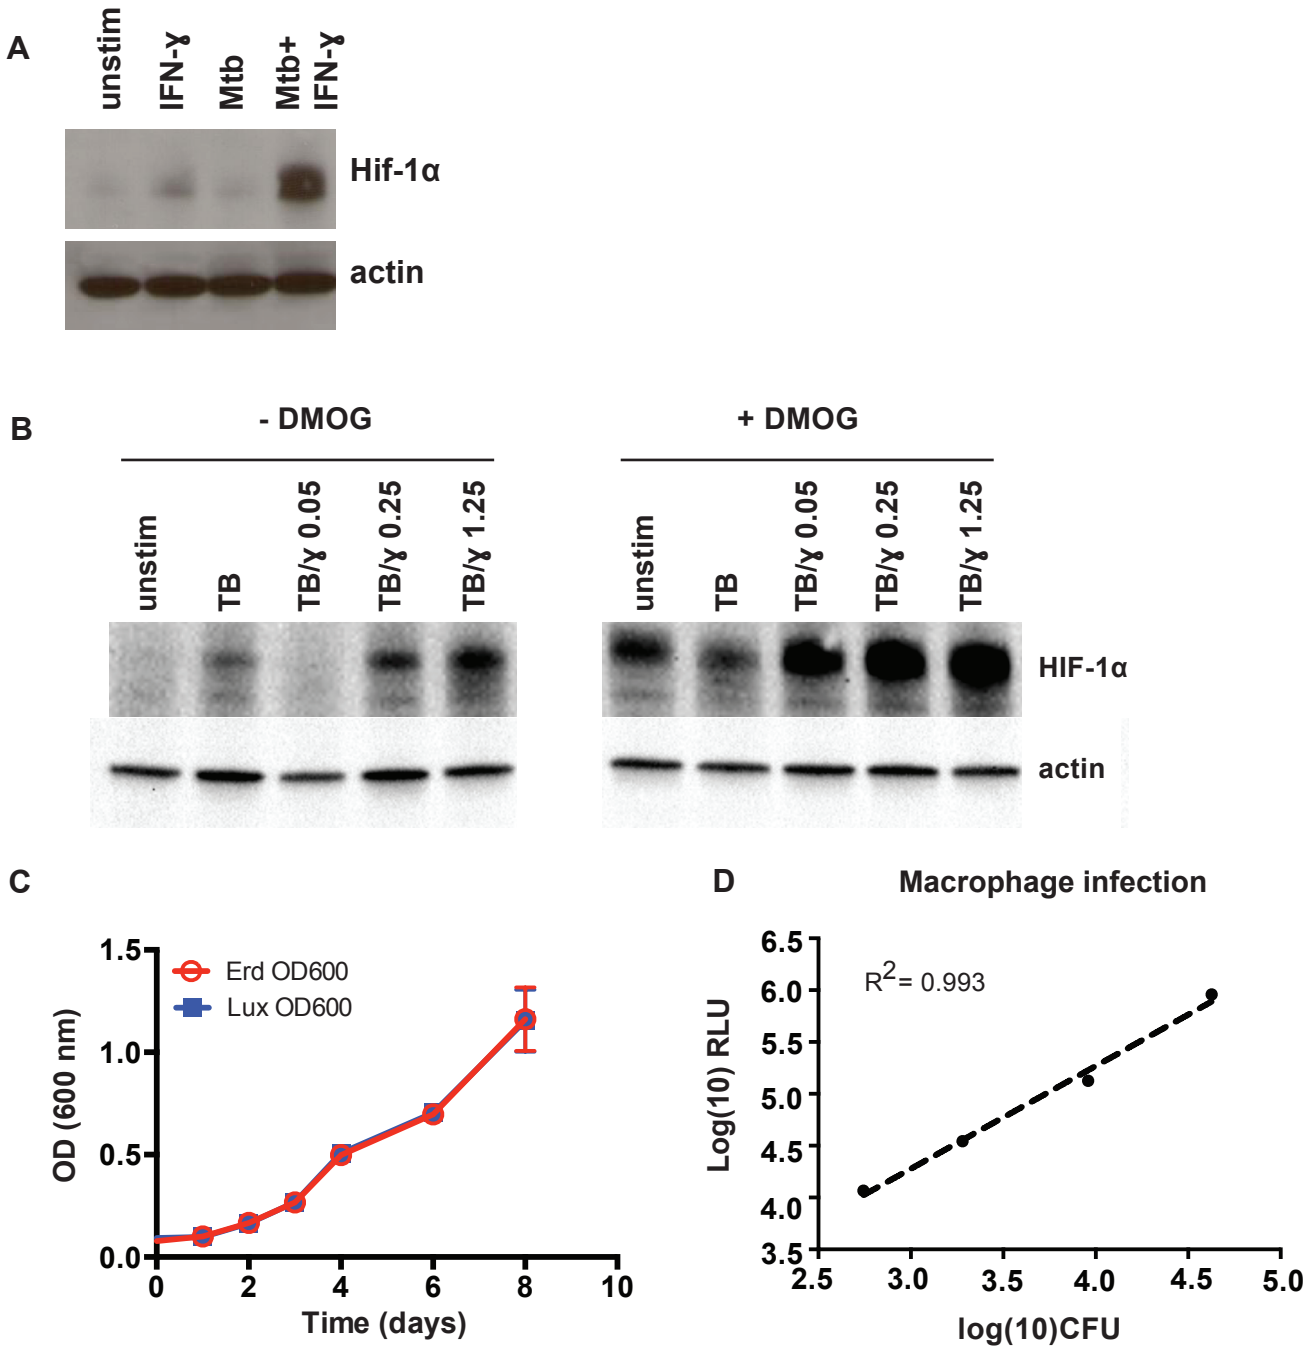

**Figure S1. Characterization of DMOG treatment of BMDM and characterization of TB-lux expressing the *luxCDABE* operon.** (A) HIF-1α western blot at 12h post infection. IFN-γ is at 1.25ng/ml (B) HIF-1α western blot 12h post-infection of WT BMDM with IFN-γ dose response (.05-1.25ng/ml) with and without addition of 200uM DMOG at the end of the 4hr phagocytosis (C) wildtype (Erdman) *M. tuberculosis* was compared to Erdman carrying a plasmid that constitutively expresses the *luxCDABE* operon. Bacteria were seeded into 7H9 at an OD600 of 0.05. OD600 measurements were taken daily to demonstrate that expression of the *luxCDABE* operon does not inhibit growth. (D) BMDM were infected with different MOIs of bacteria expressing the *luxCDABE* operon. After a 4h phagocytosis, the infected macrophages were washed and media was replaced. Luminescence was measured, and subsequently the infected monolayers were lysed and plated for CFU.

Figure S2

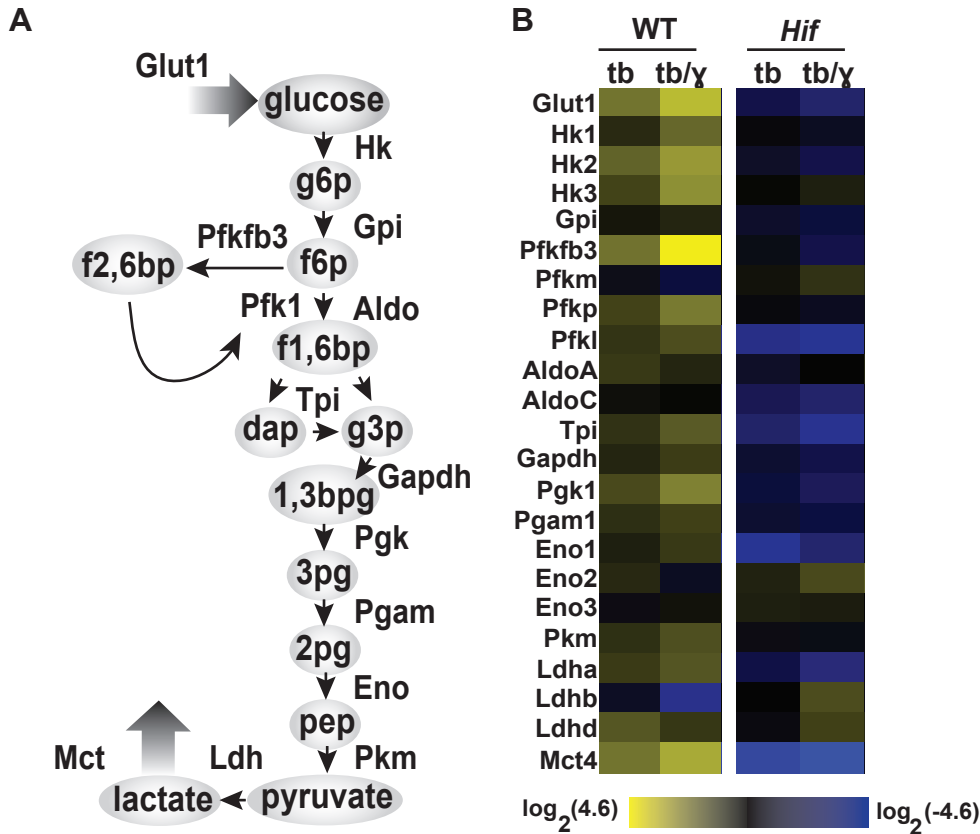

**Figure S2. HIF-1 $\alpha$  activates expression of glycolytic genes in *M. tuberculosis* infected macrophages.** (A) Glycolysis pathway depicting metabolites (grey bubbles) and enzymes. (B) Heat map depicting relative expression data from RNA-seq. Wild-type (WT) is relative to uninfected; HIF-1 $\alpha$  deficient (*Hif*) is relative to the same condition in WT. glucose 6 phosphate (g6p), fructose 6 phosphate (f6p), fructose 2,6 bisphosphate (f2,6bp), fructose 1,6 bisphosphate (f1,6bp), dihydroxyacetone phosphate (dap), glyceraldehyde 3 phosphate (g3p) 1,3 bisphosphoglycerate (1,3bpg), 3-phosphoglycerate (3pg), 2-phosphoglycerate (2pg), phosphoenolpyruvate (pep).

Figure S3

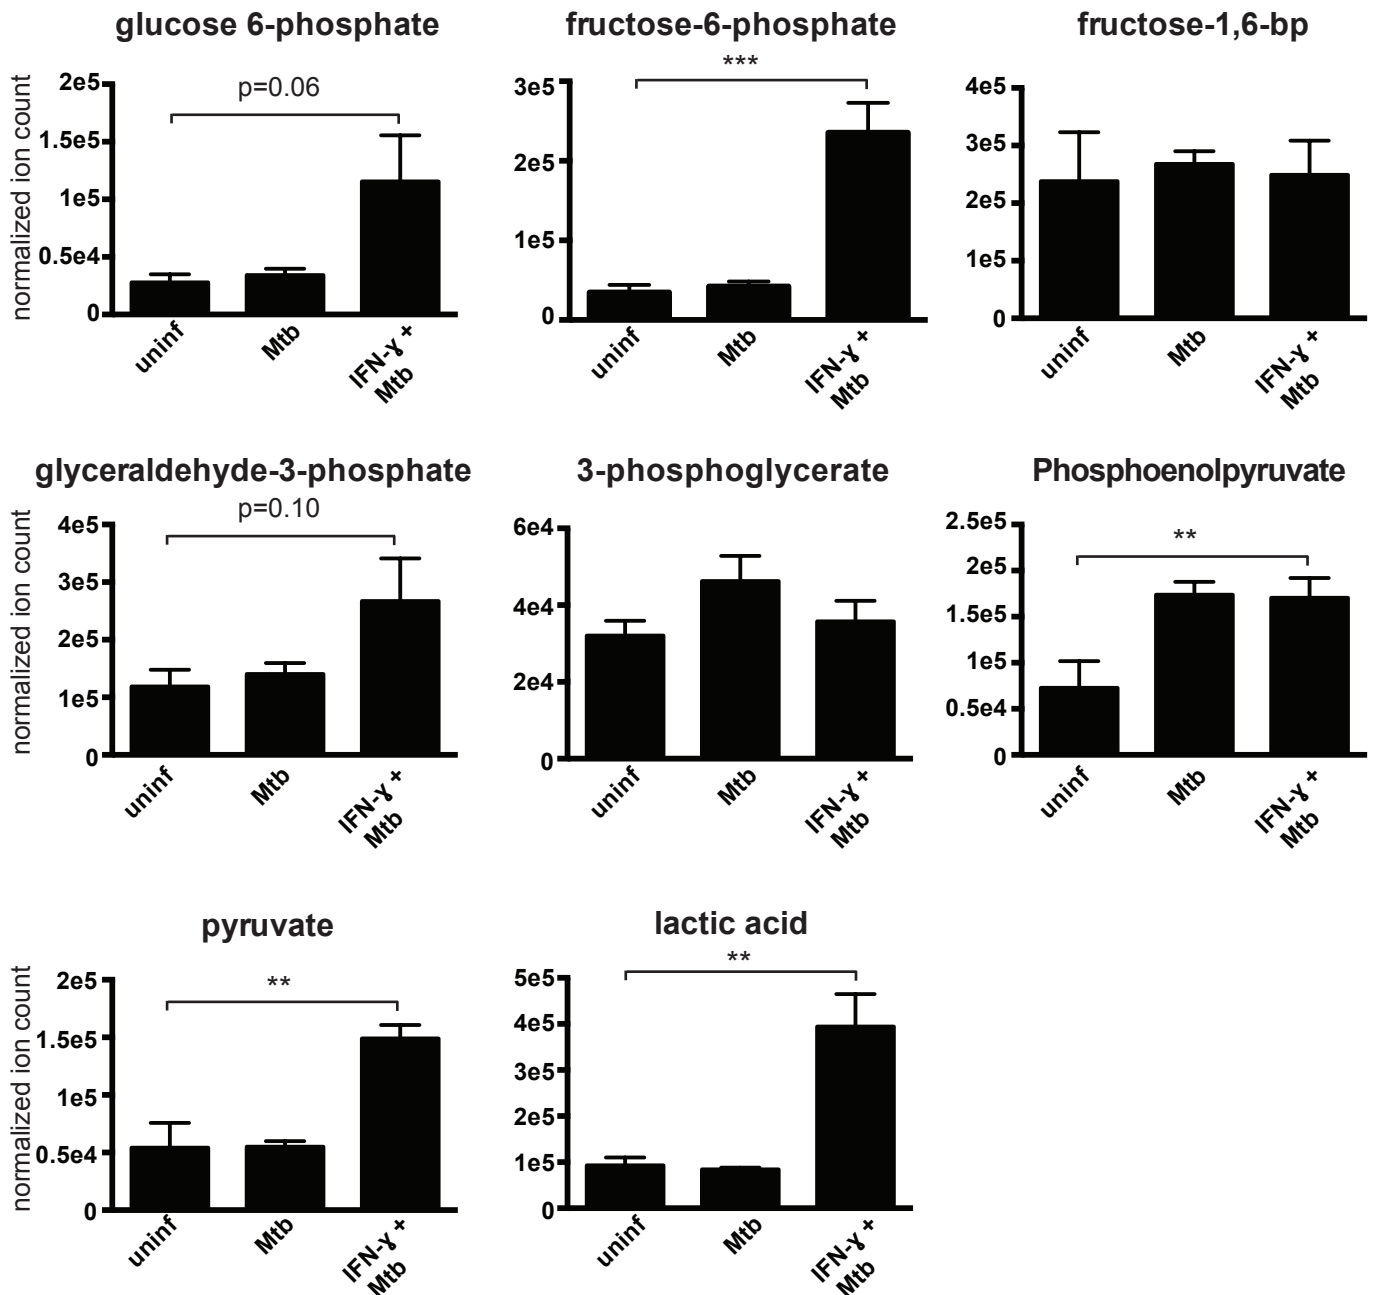

**Figure S3. Steady state levels of glycolytic intermediates in cells infected with *M. tuberculosis*.** Resting and IFN- $\gamma$  activated WT BMDM were infected with *M. tuberculosis* at MOI=1. Metabolite levels were measured using high-resolution tandem mass spectrometry in quintuplicate samples 24h post-infection and were normalized to an external control. Dihydroxyacetone phosphate (DHAP) and glyceraldehyde-3-P are isomers that are indistinguishable by mass spectrometry and are represented as glyceraldehyde-3-P. Error bars represent SEM. p-values were determined by unpaired t-test \*\*\*p $\leq$ 0.001, \*\*p $\leq$ 0.01.

Figure S4

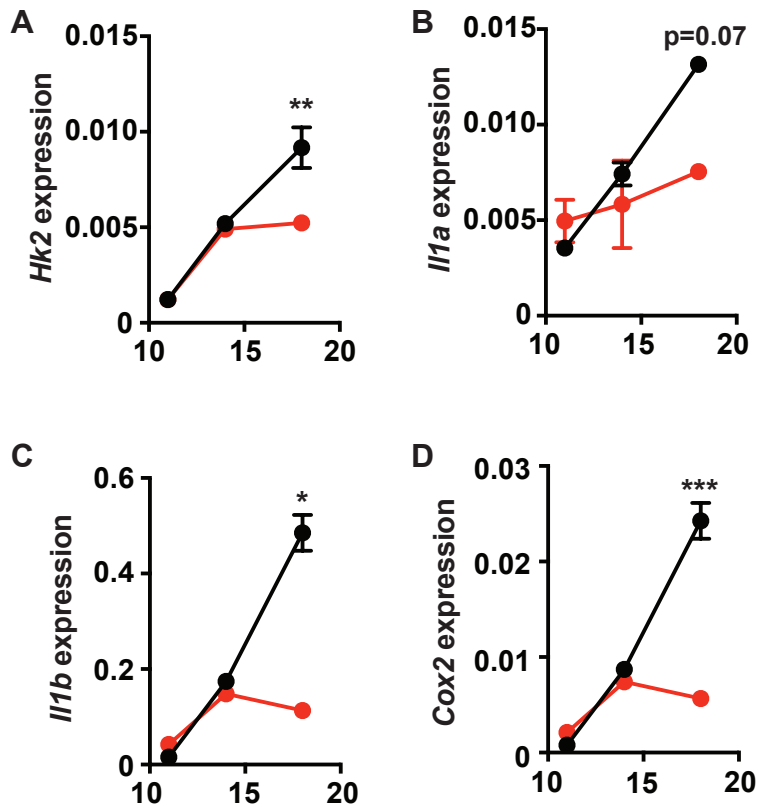

**Figure S4. HIF-1 $\alpha$  target genes are regulated *in vivo* after the onset of IFN- $\gamma$ .** CD11b<sup>+</sup> cells were isolated from lungs of infected mice as in Figure 7 and analyzed by qPCR. (A-D) Timecourse of actin normalized expression of the indicated genes. WT is in black and HIF-1 $\alpha$ <sup>-/-</sup> is in red. p-values were determined using an unpaired t-test, \*\*\*p $\leq$  0.001, \*\*p $\leq$ 0.01, \*p $\leq$ 0.05.
